# Supplementary material for: Extremely durable supercapacitor enabled by disordered porous carbon with a capacity retention up to 60 000 cycles
Source: Royal Society of Chemistry journal article supplement (doi:10.1039/d4tc04734f), 2025-01-01
Supplement: d4tc04734f1.pdf [file d4tc04734f1.pdf]

## Supporting Information

### Extremely Durable Supercapacitor Enabled by Disordered Porous Carbon with a Capacity Retention up to 60,000 Cycles

Yu Ma,<sup>a</sup> Chenmiao Ma,<sup>a</sup> Jingya Wang,<sup>a</sup> Xiaoqing Gao,<sup>a</sup> Zepeng Li,<sup>\*a</sup> and Yingdong Han<sup>\*a</sup>

a. College of Science, Civil Aviation University of China, Tianjin, 300300, P.R. China.

\*E-mail: [hansuo@126.com](mailto:hansuo@126.com) (Y. Han); [li\\_zepeng@163.com](mailto:li_zepeng@163.com) (Z. Li)

## Experimental Section

### Materials and Chemicals:

Citric acid monohydrate ( $C_6H_8O_7 \cdot H_2O$ ) and sodium chloride (NaCl) were purchased from Meryer, while potassium hydroxide (KOH) was sourced from Aladdin. Polytetrafluoroethylene dispersion (PTFE, D210C) and acetylene black were procured from Taiyuan LZ Y Technology Co., Ltd. All the water utilized in the present study is deionized water.

### Preparation of C-T:

*Synthesis of C-900:*  $C_6H_8O_7 \cdot H_2O$  (2.9 mmol, 0.613 g) was mixed in water (100 mL) under continuous stirring at room temperature until precipitation was completed. Subsequently, the resulting precipitation was subjected to freeze-drying, thereby obtaining white powders. The precursor was directly carbonized in a  $N_2$  atmosphere at 900 °C for 2 h. The mixtures were collected by filtration using commercial filter paper and thoroughly washed with deionized water. Thereafter, they were placed in an oven and dried at 50 °C for 48 h. The product was named C-900.

*Synthesis of  $HC_2$ -900:*  $C_6H_8O_7 \cdot H_2O$  (2.9 mmol, 0.613 g) and varying amounts of NaCl (21.3, 25.6 and 29.9 mmol, respectively) were thoroughly blended at room temperature for 10 minutes. Subsequently, the mixtures were subjected to freeze-drying for 96 h. The resultant composites were pyrolyzed in a  $N_2$  atmosphere at 900 °C for 2 h. The prepared samples are denoted as  $HC_x$ -900, where  $x$  represents the mole ratio of NaCl ( $x = 21.3, 25.6$  and  $29.9$  mmol, while  $C_6H_8O_7 \cdot H_2O$  is maintained at 2.9 mmol).

### Characterizations:

The morphologies of samples were characterized via a field emission scanning electron microscope (SEM, Sigma500, ZEISS, Germany) and transmission electron microscopy (TEM, JEM F200, JEOL, Japan). Fourier transform infrared (FTIR) spectra were analyzed with a Shimadzu spectrometer, in a frequency range of 4000-500  $cm^{-1}$ . The elemental mapping and content were characterized using energy dispersive spectrometer (EDS, UltimMax 40e, CIQTEK, China). The surface species and chemical states were measured by X-ray photoelectron spectroscopy (XPS, ES-CALAB 250Xi, Thermo Fisher Scientific, USA). The crystallographic structure of samples was characterized using X-ray powder diffraction (XRD, DX-2700BH, Haoyuan Instrument, China), with the samples being scanned from 10 to 90°. Raman spectra (DXR, Thermo Fisher Scientific, USA) were employed to characterize the phase compositions with a laser wavelength of 532 nm. The  $N_2$  adsorption-desorption isotherms were collected on machine (ASAP 2420, Micrometrics, USA) at 77.350 K.

### Electrochemical measurements:

Three-electrode system: cyclic voltammetry (CV), galvanostatic charge-discharge (GCD) and electrochemical impedance spectroscopy (EIS) curves of all samples were conducted on an electrochemistry workstation system (CHI 660E, CH Instruments Inc.) in a typical three-electrode system. In the test, a Pt foil serves as the counter electrode, a Hg/HgO electrode acts as the reference electrode, and 6 M KOH aqueous solution is employed as the electrolyte.

The working electrode was prepared as follows: the samples, carbon black, and polytetrafluoroethylene are thoroughly ground in an ethanol/water mixture at a ratio of 8:1:1. The resulting slurry is pressed into nickel foam ( $1 \times 1 \text{ cm}^2$ ), and then dried at  $50 \text{ }^\circ\text{C}$  for 12 h. Subsequently, it is pressed on a tablet press at a pressure of 10 MPa for 1 minute, and then placed in an oven for another 12 h of drying at  $50 \text{ }^\circ\text{C}$ .

CV tests were conducted a potential window of  $-1.1 \sim 0 \text{ V}$  at a scan rate of  $100 \text{ mV s}^{-1}$ . GCD tests were evaluated at different current densities ranging from 1 to  $20 \text{ A g}^{-1}$ . The EIS plot was recorded over the frequency range of  $100000 \sim 0.01 \text{ Hz}$  with a  $5 \text{ mV}$  sinusoidal voltage at open circuit potential. The specific capacitance of electrodes ( $C_s$ ,  $\text{F g}^{-1}$ ) was calculated from the discharge curves according to the following equation:

$$C_s = \frac{I \Delta t}{m \Delta V}$$

where  $I$  (A) denotes the constant current,  $\Delta t$  (s) is the discharge time,  $\Delta V$  (V) represents the absolute discharge potential window, and  $m$  (g) corresponds to the total mass of the samples.

For the test of two-electrode system, a symmetrical two-electrode device was fabricated in  $1 \text{ M Na}_2\text{SO}_4$  electrolyte with a potential window from 0 to 2 V. The specific capacitance of electrode ( $C_g$ ,  $\text{F g}^{-1}$ ), the energy density  $E$  ( $\text{Wh kg}^{-1}$ ), power density  $P$  ( $\text{W kg}^{-1}$ ) of the devices were calculated using the following equations:

$$C_g = \frac{4I\Delta t}{m \Delta V}$$

$$E = \frac{C \Delta V^2}{2}$$

$$P = \frac{E}{\Delta t}$$

where  $I$  (A) represents the constant current,  $\Delta t$  (s) is the discharge time,  $\Delta V$  (V) signifies the absolute discharge potential window,  $m$  (g) corresponds to the total mass of the samples, and  $C$  ( $\text{F g}^{-1}$ ) indicates the capacitance.

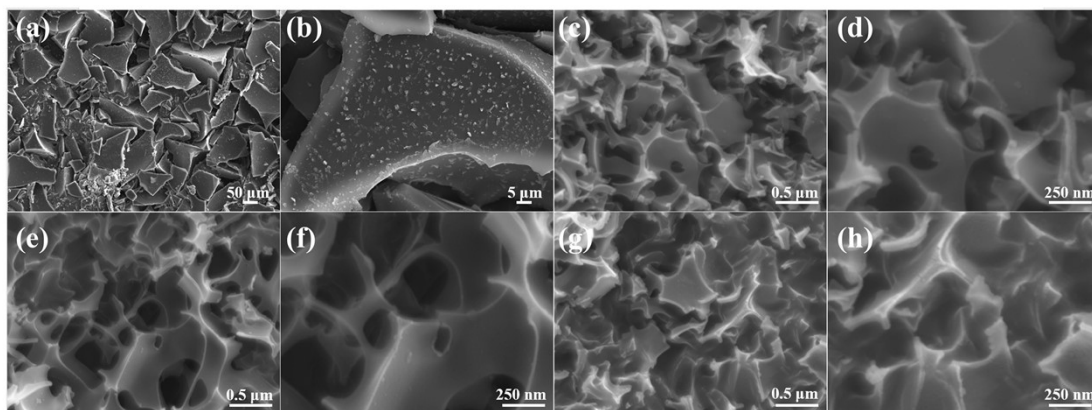

**Figure S1.** SEM images of samples (a-b) C-900, (c-d) HC<sub>1</sub>-900, (e-f) HC<sub>2</sub>-900, (g-h) HC<sub>3</sub>-900.

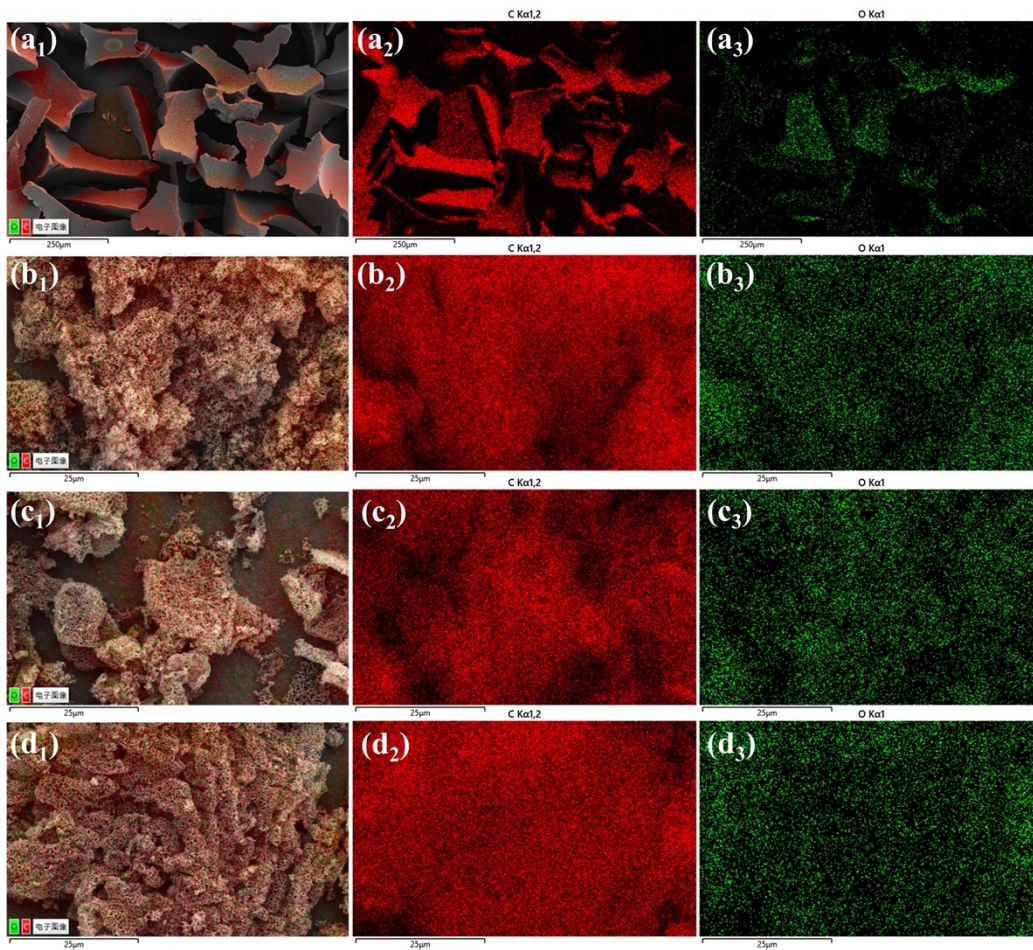

**Figure S2.** EDS mapping of samples (a<sub>1</sub>-a<sub>3</sub>) C-900, (b<sub>1</sub>-b<sub>3</sub>) HC<sub>1</sub>-900, (c<sub>1</sub>-c<sub>3</sub>) HC<sub>2</sub>-900 and (d<sub>1</sub>-d<sub>3</sub>) HC<sub>3</sub>-900.

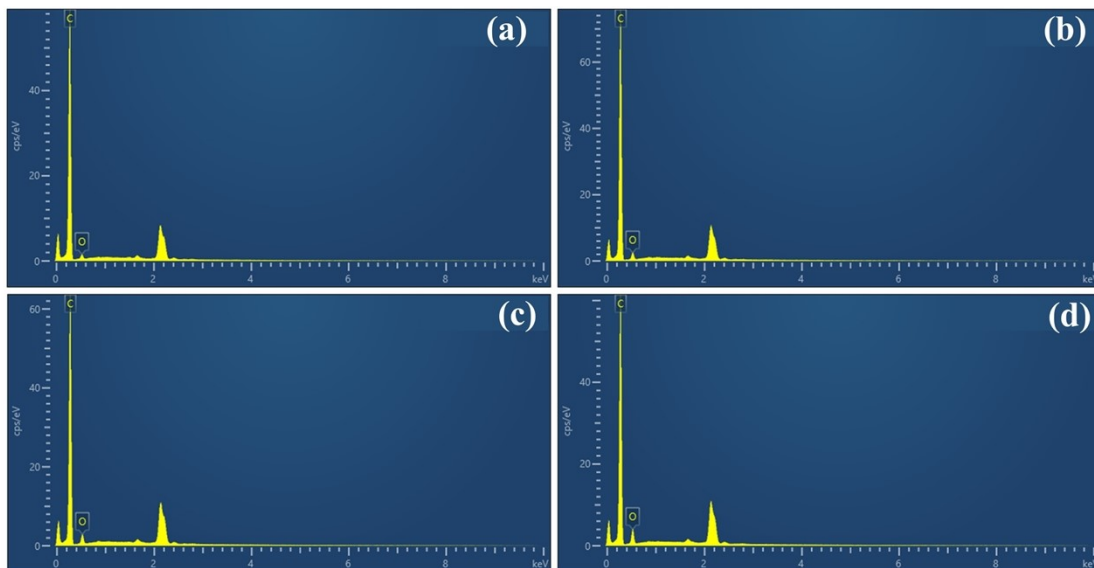

**Figure S3.** EDS curve of samples (a) C-900, (b) HC<sub>1</sub>-900, (c) HC<sub>2</sub>-900 and (d) HC<sub>3</sub>-900.

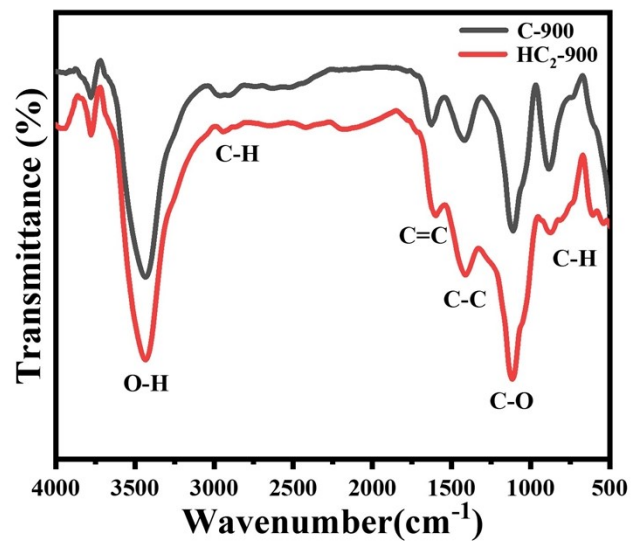

Figure S4. FTIR spectrum of samples C-900 and HC<sub>2</sub>-900.

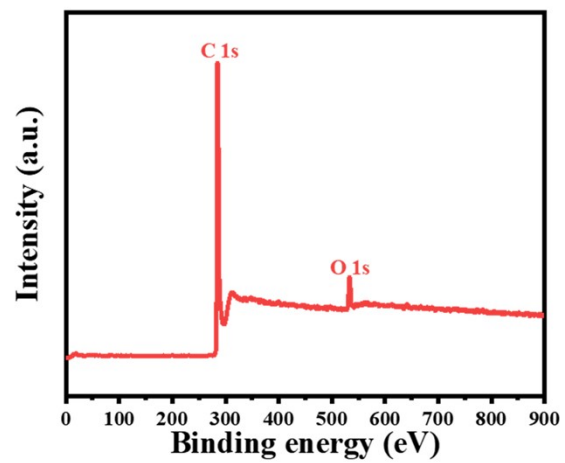

Figure S5. XPS survey spectrum of sample HC<sub>2</sub>-900.



**Table S1.** Chemical compositions of all samples.

| Sample                    | C (wt%)      | O (wt%)     |
|---------------------------|--------------|-------------|
| C-900                     | 95.87        | 4.13        |
| HC <sub>1</sub> -900      | 93.74        | 6.26        |
| <b>HC<sub>2</sub>-900</b> | <b>91.95</b> | <b>8.05</b> |
| HC <sub>3</sub> -900      | 88.77        | 11.23       |

**Table S2.** Overview of the cycling stability of typical symmetric supercapacitors based on carbon electrodes ever reported.

| <b>Electrode materials</b>        | <b>Current density (A g<sup>-1</sup>)</b> | <b>Cycle number</b> | <b>Retention (%)</b> | <b>Rf.</b>       |
|-----------------------------------|-------------------------------------------|---------------------|----------------------|------------------|
| NBC-100                           | 2                                         | 5000                | 95                   | 1                |
| GPC-900-1h                        | 5                                         | 10000               | 90                   | 2                |
| NS-HPLC-K                         | 5                                         | 10000               | 99.8                 | 3                |
| HPCs-60                           | 10                                        | 20000               | 89.9                 | 4                |
| MG-18                             | 0.1                                       | 2500                | 84.8                 | 5                |
| O-PCN-20                          | 10                                        | 20000               | 86.2                 | 6                |
| N-MHCNs-2                         | 5                                         | 3000                | 90                   | 7                |
| CPC-2                             | 5                                         | 3000                | 76                   | 8                |
| C <sub>800</sub> K <sub>0.4</sub> | 5                                         | 10000               | 94.83                | 9                |
| NCO/GQDs-10%                      | 1                                         | 3000                | 93                   | 10               |
| <b>HC<sub>2</sub>-900</b>         | <b>4</b>                                  | <b>60000</b>        | <b>98.2</b>          | <b>This work</b> |

## References

- 1 . Z. Xu, Z. Wu, J. Chi, L. E, Y. Liu, Y. Yin, Z. Yang, C. Ma, W. Li, S. Luo and S. Liu, *Appl. Surf. Sci.*, 2023, **638**, 158016.
- 2 . B. Zhang, F. Sun, Y. Li, D. Wu, C. Yang, Z. Wang, J. Gao, G. Zhao and S. Sun, *Carbon*, 2024, **219**, 118812.
- 3 . F. Fu, D. Yang, B. Zhao, Y. Fan, W. Liu, H. Lou and X. Qiu, *J. Colloid Interf Sci.*, 2023, **640**, 698-709.
- 4 . Y. Yang, D. Chen, W. Han, Y. Cheng, B. Sun, C. Hou, G. Zhao, D. Liu, G. Chen, J. Han and X. Zhang, *Carbon*, 2023, **205**, 1-9.
- 5 . G. A. Yakaboylu, C. Jiang, T. Yumak, J. W. Zondlo, J. Wang and E. M. Sabolsky, *Renew. Energy*, 2021, **163**, 276-287.
- 6 . Y. Yao, Y. Yu, C. Du, L. Wan, Y. Zhang, J. Chen, T. Xiao and M. Xie, *J. Colloid Interf Sci.*, 2023, **630**, 487-496.
- 7 . C. Wu, X. Xing, W. Xiong and H. Li, *Diam. Relat. Mater.*, 2023, **139**, 110273.
- 8 . L. Yan, A. Liu, R. Ma, C. Guo, X. Ding, P. Feng, D. Jia, M. Xu, L. Ai, N. Guo and L. Wang, *Appl. Surf. Sci.*, 2023, **615**, 156267.
- 9 . H. Zhang, X. Zhao, C. Li, Y. Ye, J. Zhang, Z. Zhang and H. Chen, *Colloids Surf. A*, 2024, **683**, 133098.
- 10 . A. Lakshmi-Narayana, N. Attarzadeh, Vlaily Shutthanandan and C. V. Ramana, *Adv. Funct. Mater.*, 2024, **34**, 2316379.
